# Supplementary material for: Putative correlates of protection against shigellosis assessing immunomarkers across responses to S. sonnei investigational vaccine
Source: PubMed Central journal article supplement (PMC10923941; doi:10.1038/s41541-024-00822-2), 2024-03-08
Supplement: 41541_2024_822_MOESM1_ESM.pdf [file 41541_2024_822_MOESM1_ESM.pdf]

## Supplementary material

### **Putative correlates of protection against shigellosis: assessing immunomarkers across immune responses to *S. sonnei* investigational vaccine 1790GAHB**

Valentino Conti, Omar Rossi, Kristen A. Clarkson, Francesca Mancini, Usman N. Nakakana, Eleanna Sarakinou, Andrea Callegaro, Pietro Ferruzzi, Alessandra Acquaviva, Ashwani Kumar Arora, Elisa Marchetti, Francesca Necchi, Robert W. Frenck Jr, Laura B. Martin, Robert W. Kaminski, Audino Podda, Francesca Micoli

#### **Contents**

|                                                                                                                                                                                                                                                                                                                                                   |   |
|---------------------------------------------------------------------------------------------------------------------------------------------------------------------------------------------------------------------------------------------------------------------------------------------------------------------------------------------------|---|
| Supplementary Figure 1. Percentage of participants with $\geq 4$ -fold increase in levels of <i>S. sonnei</i> LPS fecal sIgA (a) and <i>S. sonnei</i> LPS specific IgG/IgA levels from $\alpha 4\beta 7+$ and $\alpha 4\beta 7-$ ASCs (b-e), by outcome (no shigellosis versus shigellosis) post-challenge dose (per-protocol efficacy set) ..... | 2 |
| Supplementary Table 1. Summary of demography and baseline characteristics (per-protocol immunogenicity set).....                                                                                                                                                                                                                                  | 3 |
| Supplementary Table 2. Summary of immunogenicity results, overall .....                                                                                                                                                                                                                                                                           | 4 |
| Supplementary Table 3. Correlate of risk analysis across all assays (per-protocol set for efficacy) .....                                                                                                                                                                                                                                         | 8 |

**Supplementary Figure 1. Percentage of participants with  $\geq 4$ -fold increase in levels of *S. sonnei* LPS fecal sIgA (a) and *S. sonnei* LPS specific IgG/IgA levels from  $\alpha 4\beta 7+$  and  $\alpha 4\beta 7-$  ASCs (b-e), by outcome (no shigellosis versus shigellosis) post-challenge dose (per-protocol efficacy set)**

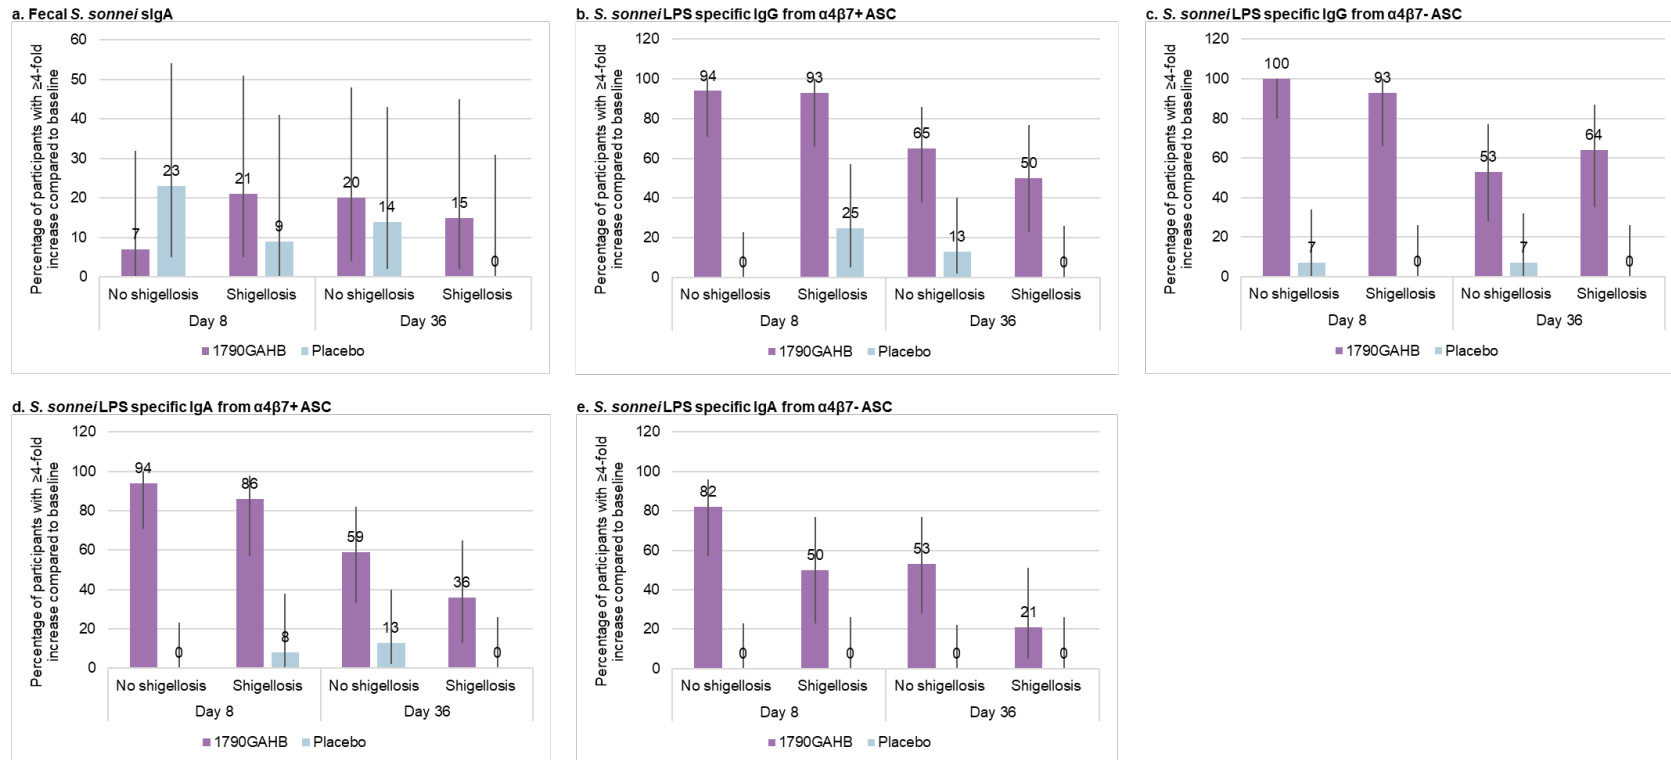

sIgA, secretory immunoglobulin A; LPS, lipopolysaccharide; Ig, immunoglobulin; ASC, antibody-secreting cell.

Note: Error bars represent 95% confidence intervals.

**Supplementary Table 1. Summary of demography and baseline characteristics (per-protocol immunogenicity set)**

|                                        | 1790GAHB group<br>(N=34) | Placebo group<br>(N=31) | Total (N=65)  |
|----------------------------------------|--------------------------|-------------------------|---------------|
| <b>Age at first vaccination, years</b> |                          |                         |               |
| Mean ± standard deviation              | 36.1±9.8                 | 34.5±8.7                | 35.3±9.3      |
| Median (minimum; maximum)              | 37.0 (19; 50)            | 31.0 (19; 49)           | 33.0 (19; 50) |
| Male sex, n (%)                        | 21 (61.8)                | 16 (51.6)               | 37 (56.9)     |
| Hispanic or Latino ethnicity, n (%)    | 1 (2.9)                  | 1 (3.2)                 | 2 (3.1)       |
| <b>Race, n (%)</b>                     |                          |                         |               |
| Black or African American              | 22 (64.7)                | 26 (83.9)               | 48 (73.8)     |
| White                                  | 10 (29.4)                | 5 (16.1)                | 15 (23.1)     |
| Other                                  | 2 (5.9)                  | 0 (0.0)                 | 2 (3.1)       |

N, number of participants; n (%), number (percentage) of participants in each category.

**Supplementary Table 2. Summary of immunogenicity results, overall**

|                                                                                     | 1790GAHB group |                          | Placebo group |                         |
|-------------------------------------------------------------------------------------|----------------|--------------------------|---------------|-------------------------|
|                                                                                     | N              | Value                    | N             | Value                   |
| <b>S. sonnei fecal sIgA</b>                                                         |                |                          |               |                         |
| D1, median (min; max)                                                               | 30             | 1.45 (1.45; 348.60)      | 25            | 1.45 (1.45; 345.45)     |
| D8, median (min; max)                                                               | 30             | 1.45 (1.45; 3682.56)     | 24            | 1.45 (1.45; 424.94)     |
| % (95% CI) of participants with $\geq$ 4-fold increase from D1                      | 30             | 13% (4–31)               | 24            | 17% (5–37)              |
| Difference from D1, median (min; max)                                               |                | 0.00 (-117.56; 3681.11)  |               | 0.00 (-314.59; 423.49)  |
| D36, median (min; max)                                                              | 29             | 1.45 (1.45; 12337.68)    | 24            | 1.45 (1.45; 385.56)     |
| % (95% CI) of participants with $\geq$ 4-fold increase from D1                      | 29             | 17% (6–36)               | 24            | 8% (1–27)               |
| Difference from D1, median (min; max)                                               |                | 0.00 (-280.04; 11989.08) |               | 0.00 (-204.81; 384.11)  |
| D64, median (min; max)                                                              | 27             | 35.04 (1.45; 3899.25)    | 24            | 34.51 (1.45; 267.24)    |
| % (95% CI) of participants with $\geq$ 4-fold increase from D1                      | 27             | 48% (29–68)              | 24            | 54% (33–74)             |
| Difference from D1, median (min; max)                                               |                | 19.46 (-87.44; 3550.65)  |               | 20.14 (-314.59; 265.79) |
| % (95% CI) of participants with $\geq$ 4-fold increase from D36                     | 26             | 42% (23–63)              | 23            | 48% (27–69)             |
| Difference from D57, median (min; max)                                              |                | 6.43 (-8438.43; 325.01)  |               | 28.91 (-333.05; 241.93) |
| <b>S. sonnei LPS specific IgG from <math>\alpha</math>4<math>\beta</math>7+ ASC</b> |                |                          |               |                         |
| D1, median (min; max)                                                               | 33             | 1.00 (1.00; 9.00)        | 31            | 1.00 (1.00; 256.00)     |
| D8, median (min; max)                                                               | 33             | 128.00 (2.00; 4096.00)   | 29            | 1.00 (1.00; 256.00)     |
| % (95% CI) of participants with $\geq$ 4-fold increase from D1                      | 33             | 94% (80–99)              | 29            | 10% (2–27)              |
| Difference from D1, median (min; max)                                               |                | 127.00 (1.00; 4095.00)   |               | 0.00 (-247.00; 255.00)  |
| D36, median (min; max)                                                              | 33             | 4.00 (1.00; 256.00)      | 30            | 1.00 (1.00; 16.00)      |
| % (95% CI) of participants with $\geq$ 4-fold increase from D1                      | 33             | 61% (42–77)              | 30            | 7% (1–22)               |
| Difference from D1, median (min; max)                                               |                | 3.00 (-2.00; 255.00)     |               | 0.00 (-255.00; 15.00)   |
| D64, median (min; max)                                                              | 32             | 3.00 (1.00; 17467.00)    | 29            | 8.00 (1.00; 4452.00)    |
| % (95% CI) of participants with $\geq$ 4-fold increase from D1                      | 32             | 47% (29–65)              | 29            | 52% (33–71)             |
| Difference from D1, median (min; max)                                               |                | 2.00 (-1.00; 17466.00)   |               | 7.00 (-2.00; 4451.00)   |

|                                                                                     | 1790GAHB group |                          | Placebo group |                        |
|-------------------------------------------------------------------------------------|----------------|--------------------------|---------------|------------------------|
|                                                                                     | N              | Value                    | N             | Value                  |
| % (95% CI) of participants with $\geq$ 4-fold increase from D36                     | 32             | 34% (19–53)              | 28            | 50% (31–69)            |
| Difference from D57, median (min; max)                                              |                | 0.00 (-127.00; 17435.00) |               | 7.00 (-14.00; 4451.00) |
| <b>S. sonnei LPS specific IgG from <math>\alpha</math>4<math>\beta</math>7- ASC</b> |                |                          |               |                        |
| D1, median (min; max)                                                               | 33             | 1.00 (1.00; 4.00)        | 31            | 1.00 (1.00; 128.00)    |
| D8, median (min; max)                                                               | 33             | 64.00 (1.00; 2048.00)    | 29            | 1.00 (1.00; 4.00)      |
| % (95% CI) of participants with $\geq$ 4-fold increase from D1                      | 33             | 97% (84–100)             | 29            | 3% (0–18)              |
| Difference from D1, median (min; max)                                               |                | 63.00 (0.00; 2047.00)    |               | 0.00 (-126.00; 3.00)   |
| D36, median (min; max)                                                              | 33             | 4.00 (1.00; 128.00)      | 30            | 1.00 (1.00; 32.00)     |
| % (95% CI) of participants with $\geq$ 4-fold increase from D1                      | 33             | 61% (42–77)              | 30            | 3% (0–17)              |
| Difference from D1, median (min; max)                                               |                | 3.00 (-1.00; 127.00)     |               | 0.00 (-127.00; 31.00)  |
| D64, median (min; max)                                                              | 32             | 1.50 (1.00; 16.00)       | 29            | 1.00 (1.00; 256.00)    |
| % (95% CI) of participants with $\geq$ 4-fold increase from D1                      | 32             | 22% (9–40)               | 29            | 24% (10–44)            |
| Difference from D57, median (min; max)                                              |                | 0.00 (0.00; 15.00)       |               | 0.00 (-2.00; 255.00)   |
| % (95% CI) of participants with $\geq$ 4-fold increase from D36                     | 32             | 6% (1–21)                | 28            | 29% (13–49)            |
| Difference from D57, median (min; max)                                              |                | -2.00 (-124.00; 14.00)   |               | 0.00 (-31.00; 255.00)  |
| <b>S. sonnei LPS specific IgA from <math>\alpha</math>4<math>\beta</math>7+ ASC</b> |                |                          |               |                        |
| D1, median (min; max)                                                               | 33             | 1.00 (1.00; 9.00)        | 31            | 1.00 (1.00; 256.00)    |
| D8, median (min; max)                                                               | 33             | 128.00 (2.00; 2048.00)   | 29            | 1.00 (1.00; 6.00)      |
| % (95% CI) of participants with $\geq$ 4-fold increase from D1                      | 33             | 91% (76–98)              | 29            | 3% (0–18)              |
| Difference from D1, median (min; max)                                               |                | 127.00 (1.00; 2047.00)   |               | 0.00 (-254.00; 3.00)   |
| D36, median (min; max)                                                              | 33             | 4.00 (1.00; 256.00)      | 30            | 1.00 (1.00; 8.00)      |
| % (95% CI) of participants with $\geq$ 4-fold increase from D1                      | 33             | 52% (34–69)              | 30            | 7% (1–22)              |
| Difference from D1, median (min; max)                                               |                | 3.00 (-2.00; 255.00)     |               | 0.00 (-255.00; 7.00)   |
| D64, median (min; max)                                                              | 32             | 3.00 (1.00; 512.00)      | 29            | 8.00 (1.00; 2048.00)   |
| % (95% CI) of participants with $\geq$ 4-fold increase from D1                      | 32             | 47% (29–65)              | 29            | 52% (33–71)            |
| Difference from D1, median (min; max)                                               |                | 1.00 (-6.00; 511.00)     |               | 7.00 (0.00; 2047.00)   |

|                                                                                                    | 1790GAHB group |                        | Placebo group |                        |
|----------------------------------------------------------------------------------------------------|----------------|------------------------|---------------|------------------------|
|                                                                                                    | N              | Value                  | N             | Value                  |
| % (95% CI) of participants with $\geq$ 4-fold increase from D36                                    | 32             | 34% (19–53)            | 28            | 54% (34–72)            |
| Difference from D57, median (min; max)                                                             |                | 0.00 (-254.00; 511.00) |               | 7.00 (-3.00; 2047.00)  |
| <b>S. sonnei LPS specific IgA from <math>\alpha</math>4<math>\beta</math>7- ASC</b>                |                |                        |               |                        |
| D1, median (min; max)                                                                              | 33             | 1.00 (1.00; 4.00)      | 31            | 1.00 (1.00; 32.00)     |
| D8, median (min; max)                                                                              | 33             | 15.00 (1.00; 512.00)   | 29            | 1.00 (1.00; 4.00)      |
| % (95% CI) of participants with $\geq$ 4-fold increase from D1                                     | 33             | 70% (51–84)            | 29            | 3% (0–18)              |
| Difference from D1, median (min; max)                                                              |                | 11.00 (0.00; 511.00)   |               | 0.00 (-31.00; 3.00)    |
| D36, median (min; max)                                                                             | 33             | 2.00 (1.00; 128.00)    | 30            | 1.00 (1.00; 2.00)      |
| % (95% CI) of participants with $\geq$ 4-fold increase from D1                                     | 33             | 39% (23–58)            | 30            | 0% (0–12)              |
| Difference from D1, median (min; max)                                                              |                | 1.00 (-1.00; 127.00)   |               | 0.00 (-31.00; 1.00)    |
| D64, median (min; max)                                                                             | 32             | 1.00 (1.00; 32.00)     | 29            | 1.00 (1.00; 64.00)     |
| % (95% CI) of participants with $\geq$ 4-fold increase from D1                                     | 32             | 6% (1–21)              | 29            | 14% (4–32)             |
| Difference from D1, median (min; max)                                                              |                | 0.00 (-1.00; 31.00)    |               | 0.00 (-28.00; 63.00)   |
| % (95% CI) of participants with $\geq$ 4-fold increase from D36                                    | 32             | 3% (0–16)              | 28            | 18% (6–37)             |
| Difference from D57, median (min; max)                                                             |                | 0.00 (-127.00; 28.00)  |               | 0.00 (-1.00; 63.00)    |
| <b>Bactericidal titers against OAg-positive <i>Shigella</i> strains using sera depleted of LPS</b> |                |                        |               |                        |
| D1, GMT (95% CI)                                                                                   | 34             | 16.50 (16.50–16.50)    | 31            | 16.50 (16.50–16.50)    |
| D29, GMT (95% CI)                                                                                  | 34             | 16.50 (16.50–16.50)    | 31            | 16.50 (16.50–16.50)    |
| % (95% CI) of participants with $\geq$ 4-fold increase from D1                                     |                | 0% (0–10)              |               | 0% (0–11)              |
| GMR (95% CI)                                                                                       |                | 1 (1–1)                |               | 1 (1–1)                |
| D57, GMT                                                                                           | 34             | 16.50 (16.50–16.50)    | 31            | 16.50 (16.50–16.50)    |
| % (95% CI) of participants with $\geq$ 4-fold increase from D1                                     |                | 0% (0–10)              |               | 0% (0–11)              |
| GMR                                                                                                |                | 1 (1–1)                |               | 1 (1–1)                |
| <b>Bactericidal titers against OAg-negative <i>Shigella</i> strains using sera depleted of LPS</b> |                |                        |               |                        |
| D1, GMT (95% CI)                                                                                   | 34             | 355.11 (263.98–477.71) | 31            | 316.21 (239.55–417.39) |
| D29, GMT (95% CI)                                                                                  |                | 481.79 (366.49–633.37) |               | 312.65 (236.42–413.45) |

|                                                                | 1790GAHB group |                        | Placebo group |                        |
|----------------------------------------------------------------|----------------|------------------------|---------------|------------------------|
|                                                                | N              | Value                  | N             | Value                  |
| % (95% CI) of participants with $\geq$ 4-fold increase from D1 | 34             | 6% (1–20)              | 31            | 0% (0–11)              |
| GMR (95% CI)                                                   |                | 1.36 (1.11–1.66)       |               | 0.99 (0.90–1.09)       |
| D57, GMT(95% CI)                                               | 34             | 503.38 (362.60–698.81) | 31            | 291.78 (217.64–391.17) |
| % (95% CI) of participants with $\geq$ 4-fold increase from D1 |                | 9% (2–24)              |               | 0% (0–11)              |
| GMR (95% CI)                                                   |                | 1.42 (1.15–1.75)       |               | 0.92 (0.84–1.01)       |

N, number of participants with available results at each timepoint; D, day; CI, confidence interval; sIgA, secretory immunoglobulin A; LPS, lipopolysaccharide; Ig, immunoglobulin; ASC, antibody-secreting cell; OAg, O antigen; GMT, geometric mean titer; GMR, geometric mean ratio.

**Supplementary Table 3. Correlate of risk analysis across all assays (per-protocol set for efficacy)**

|                                                  | 1790GAHB group |                        |         | Placebo group |                        |         | Overall |                      |         |
|--------------------------------------------------|----------------|------------------------|---------|---------------|------------------------|---------|---------|----------------------|---------|
|                                                  | N              | OR (95% CI)            | p-value | N             | OR (95% CI)            | p-value | N       | OR (95% CI)          | p-value |
| <b>S. sonnei LPS IgG</b>                         |                |                        |         |               |                        |         |         |                      |         |
| Day 1                                            | 32             | 0.172 (0.037–0.786)    | 0.023   | 28            | 0.174 (0.028–1.099)    | 0.063   | 60      | 0.175 (0.055–0.553)  | 0.003   |
| Day 57                                           | 32             | 0.326 (0.095–1.121)    | 0.075   | 28            | 0.187 (0.028–1.257)    | 0.085   |         |                      |         |
| Change from Day 1 to Day 57                      | 32             | 1.680 (0.278–10.149)   | 0.572   | 28            | 219.4 (0.070–>999.9)   | 0.189   |         |                      |         |
| <b>S. sonnei SBA</b>                             |                |                        |         |               |                        |         |         |                      |         |
| Day 1                                            | 32             | 0.036 (<0.001–0.472)*  | NA**    | 28            | 0.139 (0.002–8.265)    | 0.344   | 60      | 0.023 (<0.001–0.986) | 0.049   |
| Day 57                                           | 32             | 0.168 (0.042–0.673)    | 0.012   | 28            | 0.235 (0.024–2.292)    | 0.213   |         |                      |         |
| Change from Day 1 to Day 57                      | 32             | 0.564 (0.175–1.819)    | 0.338   | 28            | 0.426 (0.030–6.049)    | 0.528   |         |                      |         |
| <b>S. sonnei fecal sIgA</b>                      |                |                        |         |               |                        |         |         |                      |         |
| Day 1                                            | 29             | 0.790 (0.342–1.825)    | 0.581   | 25            | 0.454 (0.152–1.351)    | 0.156   | 54      | 0.639 (0.337–1.214)  | 0.171   |
| Day 36                                           | 31             | 0.707 (0.318–1.573)    | 0.395   | 27            | 0.219 (0.061–0.785)    | 0.020   |         |                      |         |
| Change from Day 1 to Day 36                      | 28             | 0.776 (0.353–1.704)    | 0.528   | 24            | 0.287 (0.021–3.877)    | 0.347   |         |                      |         |
| <b>S. sonnei LPS specific IgG from α4β7+ ASC</b> |                |                        |         |               |                        |         |         |                      |         |
| Day 1                                            | 31             | <0.001 (<0.001–1.102)* | NA**    | 28            | 3.659 (0.385–34.765)   | 0.259   | 59      | 1.407 (0.347–5.704)  | 0.633   |
| Day 36                                           | 31             | 0.572 (0.196–1.670)    | 0.307   | 27            | 0.391 (0.032–4.861)    | 0.466   |         |                      |         |
| Change from Day 1 to Day 36                      | 31             | 0.759 (0.272–2.121)    | 0.599   | 27            | 0.082 (0.002–3.104)    | 0.177   |         |                      |         |
| <b>S. sonnei LPS specific IgG from α4β7- ASC</b> |                |                        |         |               |                        |         |         |                      |         |
| Day 1                                            | 31             | 1.601 (0.006–418.73)   | 0.868   | 28            | 2.214 (0.272–18.009)   | 0.457   | 59      | 2.049 (0.301–13.952) | 0.464   |
| Day 36                                           | 31             | 0.704 (0.213–2.324)    | 0.565   | 27            | 0.253 (0.006–11.385)   | 0.479   |         |                      |         |
| Change from Day 1 to Day 36                      | 31             | 0.701 (0.218–2.225)    | 0.551   | 27            | 0.238 (0.015–3.754)    | 0.308   |         |                      |         |
| <b>S. sonnei LPS specific IgA from α4β7+ ASC</b> |                |                        |         |               |                        |         |         |                      |         |
| Day 1                                            | 31             | 0.248 (0.010–6.342)    | 0.399   | 28            | 2.078 (0.373–11.576)   | 0.404   | 59      | 1.259 (0.339–4.681)  | 0.731   |
| Day 36                                           | 31             | 0.176 (0.037–0.834)    | 0.029   | 27            | 0.365 (0.015–9.141)    | 0.540   |         |                      |         |
| Change from Day 1 to Day 36                      | 31             | 0.265 (0.065–1.072)    | 0.063   | 27            | 0.263 (0.024–2.868)    | 0.273   |         |                      |         |
| <b>S. sonnei LPS specific IgA from α4β7- ASC</b> |                |                        |         |               |                        |         |         |                      |         |
| Day 1                                            | 31             | 0.059 (<0.001–11.423)* | NA**    | 28            | 1.698 (0.151–19.152)   | 0.668   | 59      | 0.910 (0.099–8.365)  | 0.934   |
| Day 36                                           | 31             | 0.137 (0.024–0.794)    | 0.027   | 27            | 0.006 (<0.001–38.614)* | NA**    |         |                      |         |
| Change from Day 1 to Day 36                      | 31             | 0.177 (0.034–0.915)    | 0.039   | 27            | 0.056 (<0.001–143.88)  | 0.471   |         |                      |         |
| <b>S. sonnei LPS specific total IgG avidity</b>  |                |                        |         |               |                        |         |         |                      |         |
| Day 29                                           | 26             | 0.101 (0.002–6.594)    | 0.2826  | 26            | <0.001 (<0.001–0.195)  | 0.0162  |         |                      |         |
| Day 57                                           | 26             | 0.015 (<0.001–1.747)   | 0.0835  | 26            | <0.001 (<0.001–0.082)  | 0.0121  |         |                      |         |

N, number of participants with available results; OR, odds ratio; CI, Wald confidence interval; LPS, lipopolysaccharide; Ig, immunoglobulin; SBA, serum bactericidal activity; NA, not applicable; sIgA, secretory immunoglobulin A; ASC, antibody-secreting cell.



Notes: OR values  $<1$  indicate that higher values were associated with lower risk of shigellosis. At baseline, data for the 1790GAHB and Placebo groups were pooled.

\*Penalized likelihood estimate CI obtained by Firth method;

\*\*p-values can be inaccurate, so inference should be focused on the CIs.
